# Supplementary material for: Experimental determination of Henry's law constants ofdifluoromethane (HFC-32) and the salting-out effects in aqueous saltsolutions relevant to seawater
Source: Copernicus journal article supplement (doi:10.5194/acp-2017-58), 2017-02-08
Supplement: Supplementary file 1 [file acp-2017-58-supplement.pdf]

## Supporting information

### Experimental determination of Henry's law constants of difluoromethane ( $\text{CH}_2\text{F}_2$ ) and the salting-out effects in aqueous salt solutions relevant to seawater

S. Kutsuna

<sup>1</sup>National Institute of Advanced Industrial Science and Technology (AIST), 16-1 Onogawa, Tsukuba, 305-8569, Japan

Correspondence to: S. Kutsuna (s-kutsuna@aist.go.jp)

#### 10 S1. Equilibrium time for the PRV-HS method experiments

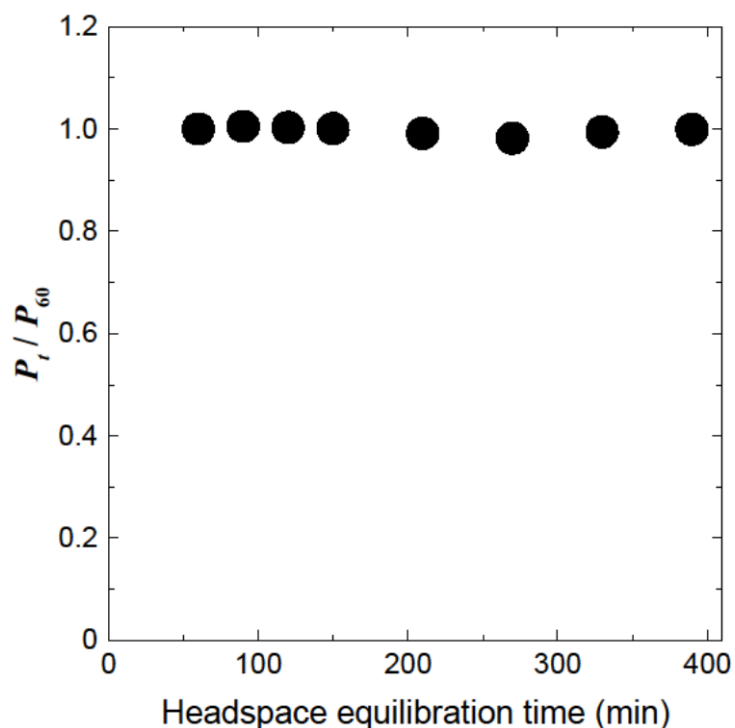

Figure S1. Relative areas of GC-MS peaks for  $\text{CH}_2\text{F}_2$  versus headspace time duration for equilibration of  $9.0 \text{ cm}^3$  of aqueous  $\text{CH}_2\text{F}_2$  at 353 K.

## S2. An example of the IGS method experiments

Figure S2 shows an example of time profile of  $P_t$  and how to calculate the  $k_1$  value for the IGS method experiments. The  $k_1$  value at each time was calculated by fitting nearest three data of  $P_t$  for each time. The average of the  $k_1$  values is given as the  $k_1$  value for the experimental run. Two standard deviation of the  $k_1$  values gives errors of the  $k_1$  value for the experimental run.

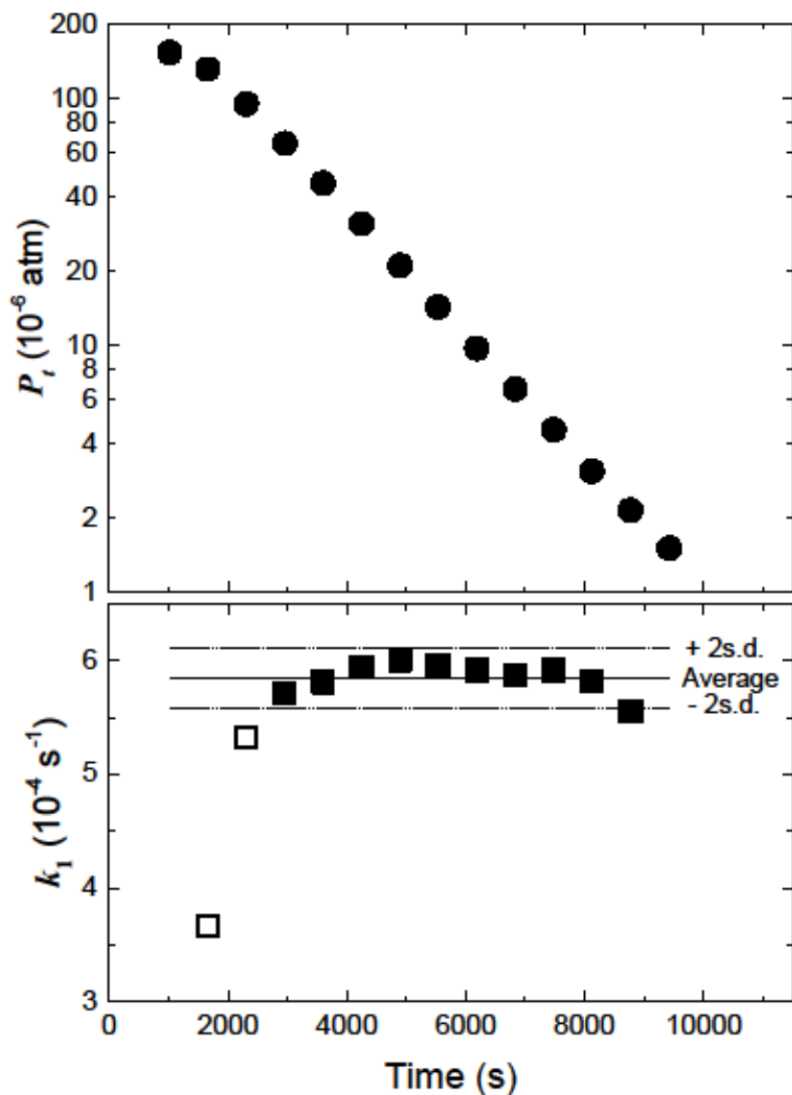

Figure S2. An IGS experimental result for  $V = 0.350$  dm $^3$  and  $F = 3.32 \times 10^{-4}$  dm $^3$  s $^{-1}$  at 25°C. (upper panel) time profile of  $P_t$ ; (lower panel) values of  $k_1$  calculated by fitting nearest three data of  $P_t$  for each time with respect to Eq. (1).

### S3. Results of the PRV-HS method experiments

Figure S3 illustrates the results of a PRV-HS experiment at 313 K. In panel A, peak area ( $S_{ij}$ ) is plotted against the volume of the  $\text{CH}_2\text{F}_2$  gas mixture added ( $v_j$ ) for  $V_i = 9.0, 7.5, 6.0, 4.5, 3.0,$  and  $1.5 \text{ cm}^3$ . For each  $V_i$ , the data form a straight line intersecting the origin, indicating that  $S_{ij}$  is proportional to  $v_j$  for vials with the same value of  $V_i$ . The slope ( $L_i$ ) of each line is obtained by linear regression with respect to Eq. (8), and the reciprocal of the slope ( $L_i^{-1}$ ) is plotted against the phase ratio ( $V_i/V_0$ ) in panel B of Fig. S3. Plots of  $L_i^{-1}$  and  $V_i/V_0$  obey Eq. (9). Table S1 lists the values of  $L_i^{-1}$ , the slopes and the intercepts for linear regression with respect to Eq. (9), and the  $K_{\text{H}}(T)$  values calculated from the slopes and the intercepts. Two measurements of  $K_{\text{H}}(T)$  were carried out at each temperature.

Furthermore, the  $K_{\text{H}}(T)$  values, along with errors of them at 95% confidence level, were also estimated by non-linear fitting of the two datasets simultaneously at each temperature by use of Eq. (11) (Fig. S4). The  $K_{\text{H}}(T)$  values and their errors thus estimated are plotted in Fig. 2 and are listed in Table S1.

**Table S1.  $L_i$  values for various  $V_i/V_0$  ratios at various temperatures, slopes and intercepts for linear regression with respect to Eq. (10),  $K_{\text{H}}(T)$  values calculated from the slopes and intercepts, and  $K_{\text{H}}(T)$  values and the errors at 95% confidence level estimated by non-linear fitting the two datasets simultaneously at each temperature (Fig. S4) with respect to Eq. (11).**

| $T$<br>(K) | $L_i$ (a.u.) <sup>*</sup> |             |             |             |             |             | Eq. (10)<br>Intercept | Eq. (10)<br>Slope | $K_{\text{H}}$ (M atm <sup>-1</sup> ) |            |            |
|------------|---------------------------|-------------|-------------|-------------|-------------|-------------|-----------------------|-------------------|---------------------------------------|------------|------------|
|            | $V_i/V_0 = 0.421$         | 0.351       | 0.280       | 0.210       | 0.140       | 0.070       |                       |                   | Eq. (10)                              | Eq. (11)** | Eq. (13)** |
| 353        | 3.226±0.002               | 3.270±0.026 | 3.330±0.004 | 3.391±0.008 | 3.462±0.014 | 3.526±0.009 | 3.581                 | -0.870            | 0.026                                 | 0.027      | 0.031      |
|            | 2.044±0.006               | 2.050±0.012 | 2.112±0.010 | 2.132±0.009 | 2.186±0.021 | 2.209±0.011 | 2.248                 | -0.513            | 0.027                                 | ±0.002     | ±0.003     |
| 343        | 3.000±0.018               | 3.025±0.009 | 3.070±0.008 | 3.089±0.015 | 3.117±0.015 | 3.148±0.018 | 3.179                 | -0.423            | 0.031                                 | 0.031      | 0.033      |
|            | 1.949±0.004               | 1.955±0.005 | 1.968±0.003 | 1.998±0.004 | 2.020±0.002 | 2.030±0.009 | 2.050                 | -0.258            | 0.031                                 | ±0.001     | ±0.002     |
| 333        | 3.247±0.018               | 3.234±0.018 | 3.243±0.015 | 3.241±0.010 | 3.247±0.009 | 3.223±0.013 | 3.231                 | 0.034             | 0.037                                 | 0.036      | 0.037      |
|            | 3.080±0.009               | 3.044±0.006 | 3.082±0.005 | 3.127±0.009 | 3.113±0.008 | 3.134±0.014 | 3.149                 | -0.213            | 0.034                                 | ±0.003     | ±0.002     |
| 323        | 3.208±0.011               | 3.190±0.008 | 3.133±0.010 | 3.134±0.011 | 3.092±0.008 | 3.093±0.006 | 3.055                 | 0.355             | 0.042                                 | 0.043      | 0.042      |
|            | 3.357±0.010               | 3.289±0.014 | 3.275±0.005 | 3.233±0.004 | 3.226±0.016 | 3.160±0.001 | 3.135                 | 0.496             | 0.044                                 | ±0.002     | ±0.001     |
| 313        | 3.245±0.018               | 3.185±0.013 | 3.100±0.015 | 3.022±0.012 | 2.995±0.012 | 2.915±0.011 | 2.848                 | 0.935             | 0.052                                 | 0.052      | 0.049      |
|            | 2.162±0.031               | 2.134±0.010 | 2.060±0.014 | 2.029±0.018 | 1.992±0.010 | 1.925±0.018 | 1.896                 | 0.612             | 0.052                                 | ±0.003     | ±0.001     |

\* Errors are  $2\sigma$  for the regression only.; \*\* Errors are those at 95% confidence level for the regression only.

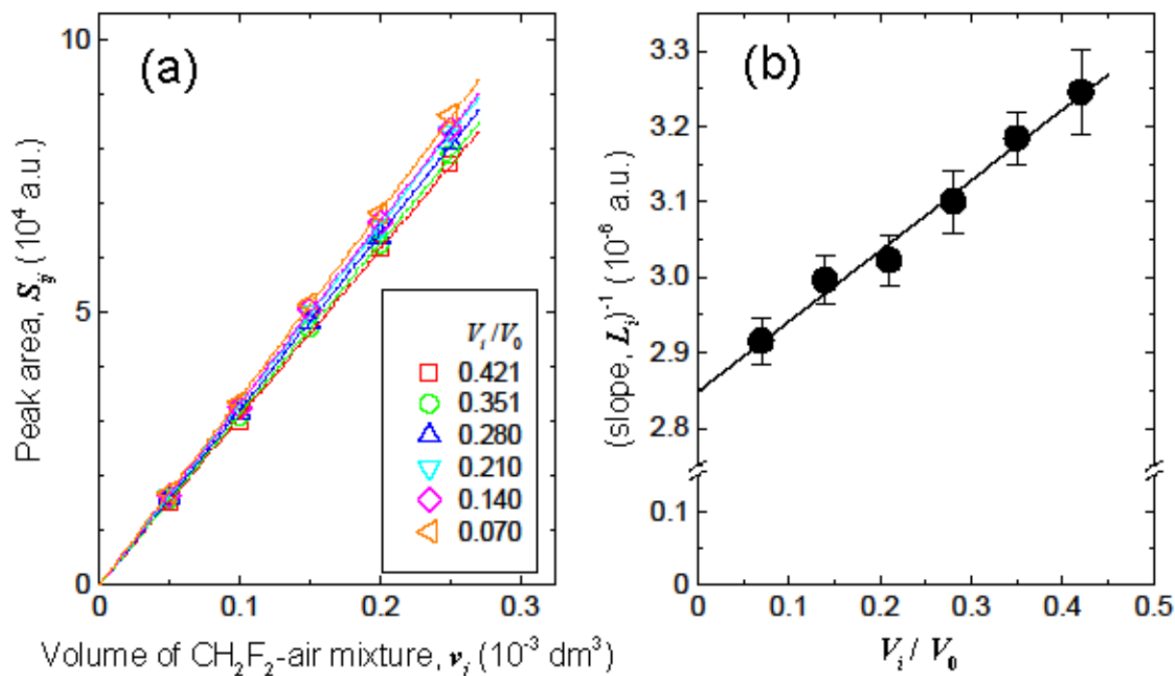

Figure S3. Headspace GC-MS measurements for six series of test samples containing water ( $V_i$  in  $\text{cm}^3$ ) to which a  $\text{CH}_2\text{F}_2$ -air mixture was added ( $v_j$  in  $\text{cm}^3$ ) at 313 K. (a) Plot of peak area ( $S_{ij}$ ) versus  $v_j$  for test samples containing volume  $V_i$  of water. Slope ( $L_i$ ) was obtained by linear fitting of the data to Eq. (8) for samples of the same  $V_i$ . (b) Plot of  $L_i^{-1}$  versus  $V_i/V_0$  fitted to Eq. (10).

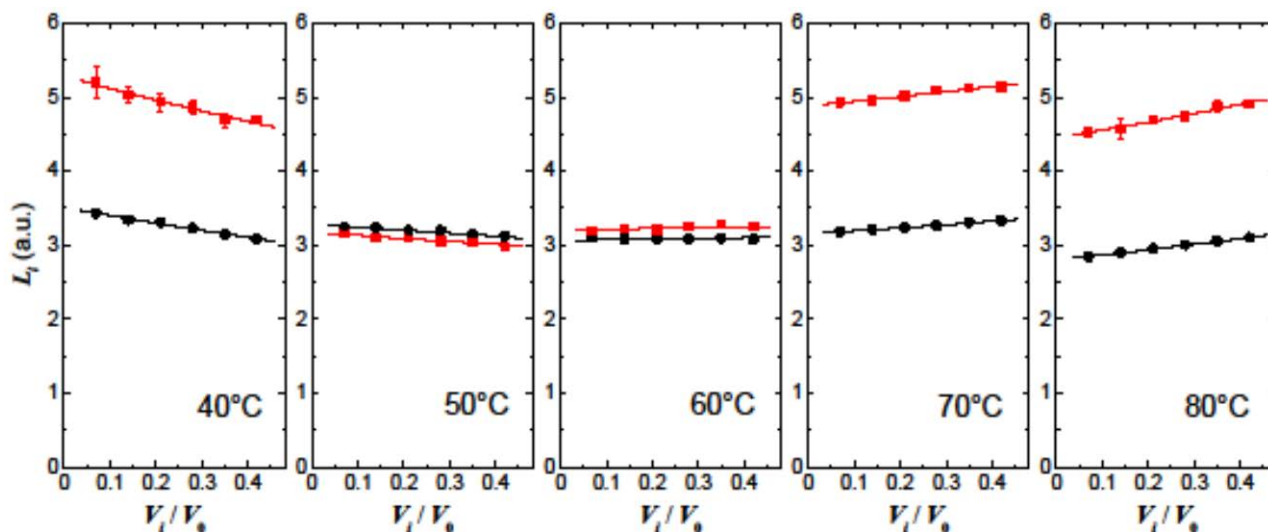

Figure S4. Plot of  $L_i$  versus  $V_i/V_0$  for the PRV-HS measurements at each temperature. Bold curves represent the simultaneous fitting of the two datasets at each temperature by Eq. (11).

#### S4. Determination of salting-out effects in artificial seawater

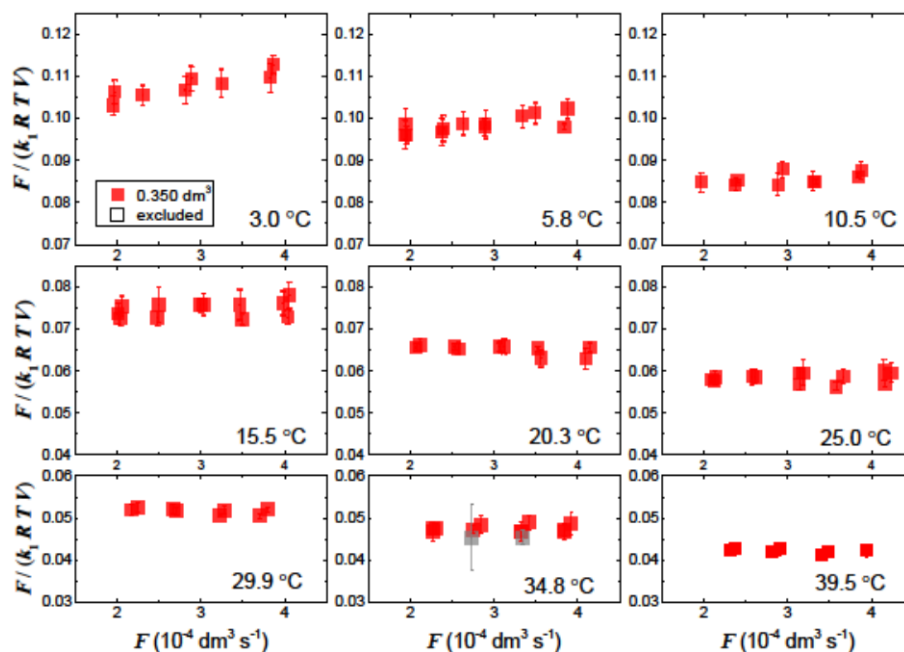

Figure S5. Plots of values of  $F/(k_1RTV)$  against  $F$  at each temperature for  $0.35 \text{ dm}^3$  of a-seawater at 4.452%. Grey symbols represent the data excluded for calculating the average.

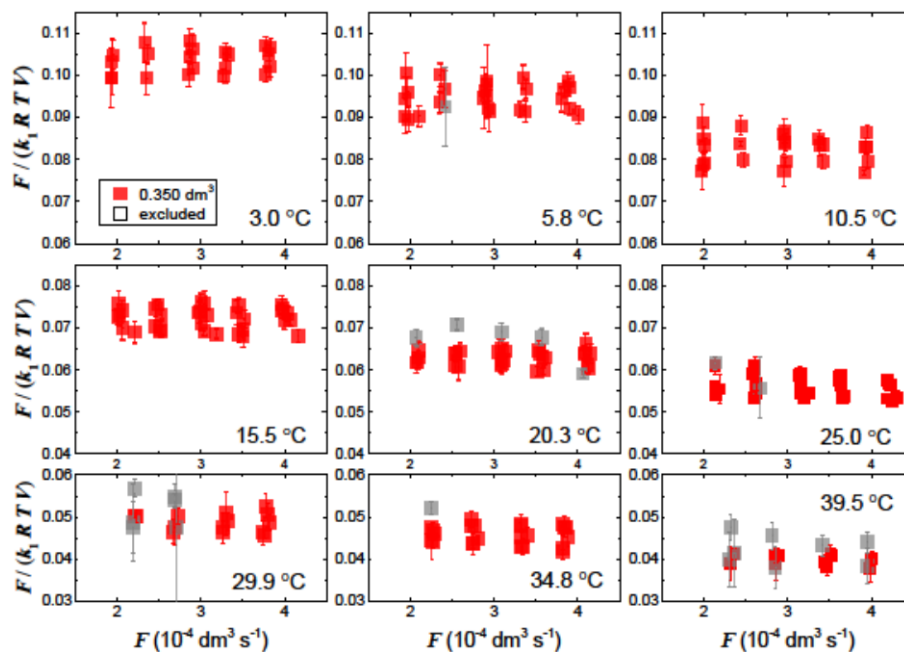

Figure S6. Plots of values of  $F/(k_1RTV)$  against  $F$  at each temperature for  $0.35 \text{ dm}^3$  of a-seawater at 8.921%. Grey symbols represent the data excluded for calculating the average.

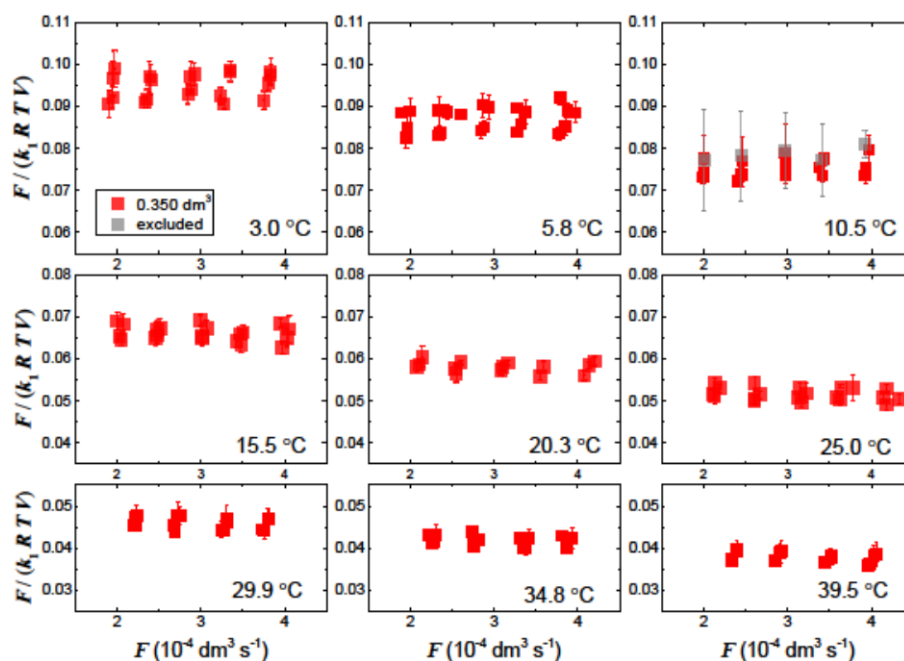

5 Figure S7. Plots of values of  $F/(k_1RTV)$  against  $F$  at each temperature for  $0.35 \text{ dm}^3$  of a-seawater at 21.520%. Grey symbols represent the data excluded for calculating the average.

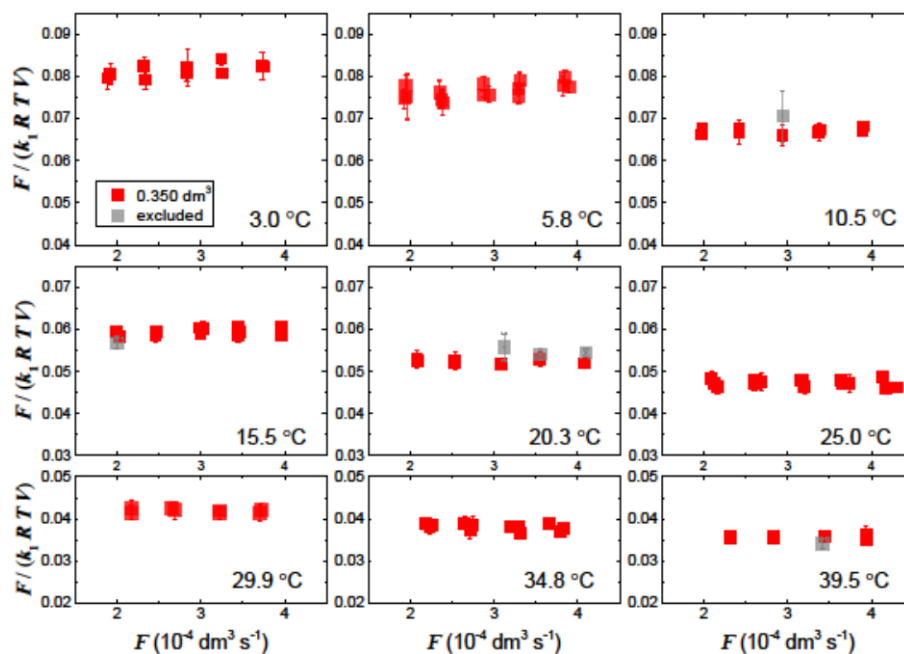

Figure S8. Plots of values of  $F/(k_1RTV)$  against  $F$  at each temperature for  $0.35 \text{ dm}^3$  of a-seawater at 51.534%. Grey symbols represent the data excluded for calculating the average.

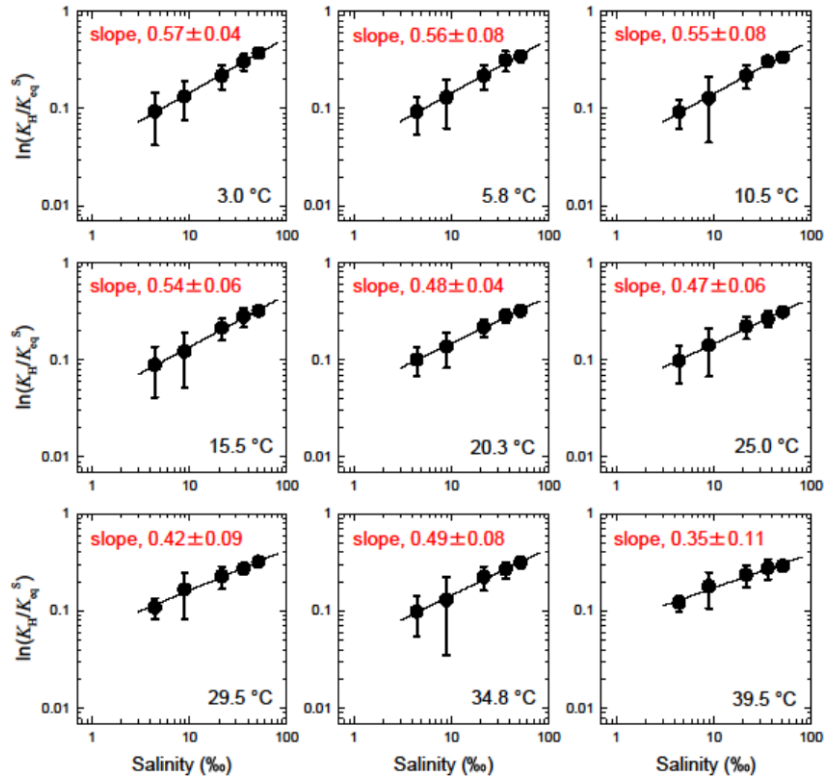

Figure S9. log-log plots for  $\ln(K_H(T)/K_H^S(T))$  vs. salinity in a-seawater at each temperature. Bold lines represent the fitting obtained by a liner regression. Errors are those at 95% confidence level for the regression only.

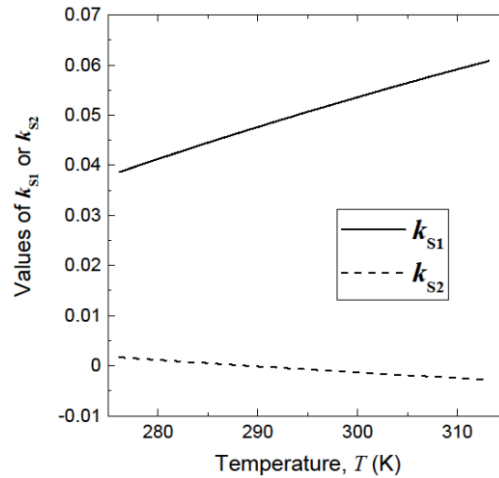

Figure S10. Plots of  $k_{s1}$  and  $k_{s2}$  (coefficients in Eq. (18)) against temperature.
