# Supplementary material for: Experimental determination of Henry's law constants ofdifluoromethane (HFC-32) and the salting-out effects in aqueous saltsolutions relevant to seawater
Source: Copernicus journal article supplement (doi:10.5194/acp-2017-58), 2017-02-08
Supplement: Supplementary file [file acp-2017-58-AC4-supplement.pdf]

Thank you very much for the constructive comments.

The comments are on description of errors and potential systematic bias for the determined values, discussion of the salting-out behavior observed, estimate of the amount of CH<sub>2</sub>F<sub>2</sub> dissolved in the ocean mixed layer, and relation between dissolution of CH<sub>2</sub>F<sub>2</sub> in the ocean and estimation of CH<sub>2</sub>F<sub>2</sub> emissions in the Southern Hemisphere and its seasonal variability.

I will reply to each comment as follows. Parts of texts and numbers revised in the manuscript are marked in blue.

**R1. Reply to the comment on discussion of experimental error. What are the parameters that limit the accuracy of the inert-gas stripping (IGS) method? Of the stripping column apparatus? And of the phase ratio variation headspace (PRV-HS) method? Do error bars reflect statistics only, or also potential sources of systematic bias?**

Thank you for the comments.

I reply to the comments in the sequence: (1) on the parameters that limit the accuracy of the IGS method; (2) on the parameters that limit the accuracy of the PRV-HS method; and (3) on error bars.

(1) the parameters that limit the accuracy of the IGS methods

The parameters that limit the accuracy of the IGS methods are temperature of the test solution ( $T$ ) and flow rate of purge gas ( $F$ ).

The accuracy of  $T$  ( $\delta T$ ) are within 0.2 K and may give potential systematic bias of  $\pm 0.5$  to  $\pm 0.6$  % ( $\delta K_{\text{eq}}/K_{\text{eq}}$ ), where  $\delta K_{\text{eq}}$  indicates an error of  $K_{\text{eq}}$ .

For  $F$ , the accuracy of  $F_{\text{meas}}$  is estimated to be within 1% from the accuracy of the high-precision film flow meter SF-1U with VP-2U used for calibrating the soap flow meter. Errors in the term of  $\frac{P_{\text{meas}}-h_{\text{meas}}}{P_{\text{hs}}-h} \times \frac{T}{T_{\text{meas}}}$  in Eq (3) are estimated at ca.  $\pm 1$  %. Hence, the accuracy of  $F$  ( $\delta F$ ) are estimated to be within 1.4 % and may give potential systematic bias of  $\pm 1.4$  % of  $\delta K_{\text{eq}}/K_{\text{eq}}$ .

Values of  $\delta K_{\text{eq}}/K_{\text{eq}}$  due to both  $\delta T$  and  $\delta F$  may thus have potential systematic bias of ca.  $\pm 2\%$ .

(2) the parameters that limit the accuracy of the PRV-HS methods

The parameters that limit the accuracy of the PRV-HS methods are temperature of the test solution ( $T$ ) and volume of the vials used ( $V$ ).

Although the apparatus used (Agilent, HP7694) was expected to keep  $T$  constant, the accuracy of  $T$  may not be certified. I have applied the same apparatus to determination of the  $K_{\text{H}}$  values for some HCFCs such as HCFC-123 using the PRV-HS methods [Kutsuna, S. *Int. J. Chem. Kinet.*, 45, 440-451, 2013]. On the basis of the  $K_{\text{H}}$  values thus determined and comparison between them and the reported values for HCFC-123, errors of  $T$  are estimated to be within ca. 2 K. These errors of  $T$  may give potential systematic bias of ca.  $\pm 4$  % ( $\delta K_{\text{eq}}/K_{\text{eq}}$ ) at 313 K and ca.  $\pm 3$  % ( $\delta K_{\text{eq}}/K_{\text{eq}}$ ) at 353 K.

Errors for  $V$  ( $\delta V$ ) are estimated to be less than 1 %, and these errors may give potential systematic bias of less than 1 % of  $\delta K_{\text{eq}}/K_{\text{eq}}$ .

Accordingly, for the PRV-HS methods, values of  $\delta K_{\text{eq}}/K_{\text{eq}}$  due to both  $\delta T$  and  $\delta V$  may have potential systematic bias of ca.  $\pm 4\%$ .

(3) Error bars in Figure 2

Error bars in Figure 2 reflect statics only (Error\_S) in the original manuscript. Error bars in Figure 2m represent errors (Error\_T) reflecting both Error\_S and potential systematic bias (Error\_B). Values of Error\_T are also indicated in Tables 1m, S1m and 3m. Values of Error\_T are calculated by (Error\_S + Error\_B) rather than  $\sqrt{(\text{Error}_S)^2 + (\text{Error}_B)^2}$  because

Error\_B is potential systematic bias.

**Table 1m.** The average of values of  $F/(k_1RTV)$  obtained for  $V$  value of  $0.350 \text{ dm}^3$  and  $0.300 \text{ dm}^3$  and the  $K_H(T)$  value derived from Eq. (13) at each temperature.  $N$  represents number of experimental runs for the average.

| $T$ (K) | $F / (k_1RTV)$          |        |                       |        | $K_H(T)$ (M atm <sup>-1</sup> ) |
|---------|-------------------------|--------|-----------------------|--------|---------------------------------|
|         | $V = 0.350$             |        | $V = 0.300$           |        |                                 |
|         | average <sup>a, b</sup> | $N^c$  | average <sup>a</sup>  | $N^c$  | From Eq. (13) <sup>d</sup>      |
| 276.15  | 0.119 ± 0.006 (0.008)   | 21 (2) | 0.117 ± 0.006 (0.008) | 11 (0) | 0.118 ± 0.003                   |
| 278.35  | 0.107 ± 0.005 (0.007)   | 18 (3) | 0.110 ± 0.005 (0.007) | 14 (0) | 0.108 ± 0.002                   |
| 283.65  | 0.093 ± 0.003 (0.005)   | 27 (5) | 0.092 ± 0.001 (0.003) | 5 (0)  | 0.094 ± 0.002                   |
| 288.65  | 0.082 ± 0.006 (0.008)   | 41 (5) | 0.084 ± 0.006 (0.008) | 12 (0) | 0.082 ± 0.002                   |
| 293.45  | 0.071 ± 0.001 (0.002)   | 15 (8) | 0.071 ± 0.001 (0.002) | 5 (0)  | 0.072 ± 0.002                   |
| 298.15  | 0.064 ± 0.002 (0.003)   | 30 (6) | 0.067 ± 0.005 (0.006) | 12 (0) | 0.064 ± 0.002                   |
| 303.05  | 0.057 ± 0.003 (0.004)   | 16 (0) | 0.056 ± 0.005 (0.006) | 4 (0)  | 0.058 ± 0.002                   |
| 307.95  | 0.051 ± 0.001 (0.002)   | 12 (6) | 0.054 ± 0.004 (0.005) | 10 (0) | 0.052 ± 0.002                   |
| 312.65  | 0.046 ± 0.001 (0.002)   | 13 (3) | 0.047 ± 0.001 (0.002) | 4 (0)  | 0.048 ± 0.001                   |

a. Errors are  $2\sigma$  for the average only.; b. Number in parenthesis represents an error reflecting both  $2\sigma$  for the average and potential systematic bias.; c. Number in parenthesis represents number of experimental runs excluded for the average.; d. Errors are 95% confidence level for the regression only.

**Table S1m.**  $L_i$  values for various  $V_i/V_0$  ratios at various temperatures, slopes and intercepts for linear regression with respect to Eq. (10),  $K_H(T)$  values calculated from the slopes and intercepts, and  $K_H(T)$  values and the errors at 95% confidence level estimated by non-linear fitting the two datasets simultaneously at each temperature (Fig. S4) with respect to Eq. (11).

| $T$ (K) | $L_i$ (a.u.) <sup>*</sup> |             |             |             |             |             | Eq. (10) Intercept | Eq. (10) Slope | $K_H$ (M atm <sup>-1</sup> ) |                            |                        |
|---------|---------------------------|-------------|-------------|-------------|-------------|-------------|--------------------|----------------|------------------------------|----------------------------|------------------------|
|         | $V_i/V_0 = 0.421$         | 0.351       | 0.280       | 0.210       | 0.140       | 0.070       |                    |                | Eq. (10)                     | Eq. (11) <sup>**</sup> *** | Eq. (13) <sup>**</sup> |
| 353     | 3.226±0.002               | 3.270±0.026 | 3.330±0.004 | 3.391±0.008 | 3.462±0.014 | 3.526±0.009 | 3.581              | -0.870         | 0.026                        | 0.027 ±0.002               | 0.031 ±0.003           |
|         | 2.044±0.006               | 2.050±0.012 | 2.112±0.010 | 2.132±0.009 | 2.186±0.021 | 2.209±0.011 | 2.248              | -0.513         | 0.027                        | (±0.003)                   |                        |
| 343     | 3.000±0.018               | 3.025±0.009 | 3.070±0.008 | 3.089±0.015 | 3.117±0.015 | 3.148±0.018 | 3.179              | -0.423         | 0.031                        | 0.031 ±0.001               | 0.033 ±0.002           |
|         | 1.949±0.004               | 1.955±0.005 | 1.968±0.003 | 1.998±0.004 | 2.020±0.002 | 2.030±0.009 | 2.050              | -0.258         | 0.031                        | (±0.002)                   |                        |
| 333     | 3.247±0.018               | 3.234±0.018 | 3.243±0.015 | 3.241±0.010 | 3.247±0.009 | 3.223±0.013 | 3.231              | 0.034          | 0.037                        | 0.036 ±0.003               | 0.037 ±0.002           |
|         | 3.080±0.009               | 3.044±0.006 | 3.082±0.005 | 3.127±0.009 | 3.113±0.008 | 3.134±0.014 | 3.149              | -0.213         | 0.034                        | (±0.004)                   |                        |
| 323     | 3.208±0.011               | 3.190±0.008 | 3.133±0.010 | 3.134±0.011 | 3.092±0.008 | 3.093±0.006 | 3.055              | 0.355          | 0.042                        | 0.043 ±0.002               | 0.042 ±0.001           |
|         | 3.357±0.010               | 3.289±0.014 | 3.275±0.005 | 3.233±0.004 | 3.226±0.016 | 3.160±0.001 | 3.135              | 0.496          | 0.044                        | (±0.004)                   |                        |
| 313     | 3.245±0.018               | 3.185±0.013 | 3.100±0.015 | 3.022±0.012 | 2.995±0.012 | 2.915±0.011 | 2.848              | 0.935          | 0.052                        | 0.052 ±0.003               | 0.049 ±0.001           |
|         | 2.162±0.031               | 2.134±0.010 | 2.060±0.014 | 2.029±0.018 | 1.992±0.010 | 1.925±0.018 | 1.896              | 0.612          | 0.052                        | (±0.005)                   |                        |

\* Errors are  $2\sigma$  for the regression only.; \*\* Errors are those at 95% confidence level for the regression only.; \*\*\* Number in parenthesis represents both errors at 95% confidence level for the regression and potential systematic bias.

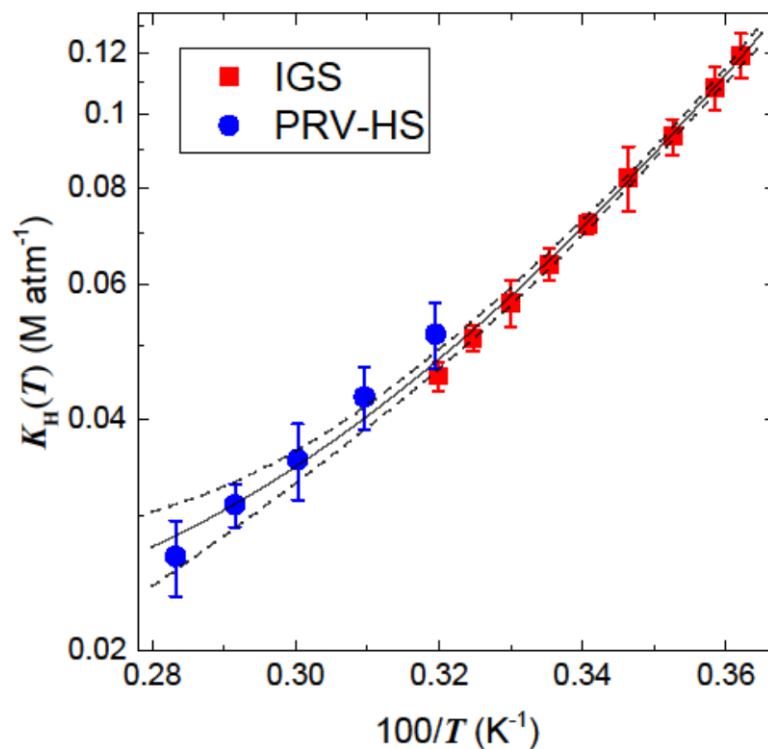

Figure 2m. van't Hoff plot of the  $K_H$  values obtained by the IGS method and the PRV-HS method. Bold curve displays the fitting of the data obtained by the IGS method and the PRV-HS method (Eq. (13)). Dashed curves display upper and lower 95% confidence limit of the above fitting by Eq. (12). Error bars of the data by the IGS method represent both  $2\sigma$  for the average and potential systematic bias. Error bars of the data by PRV-HS method represent both errors at 95% confidence level for the regression and potential systematic bias.

**R2. Reply to the comment 2 that there does appear to be a small – yet significant – offset between PRV-HS and IGS method in Figure 2 at 312 K and why IGS is believed to be more accurate.**

Thank you for the comments.

There appears to be a small - yet significant - offset between PRV-HS and IGS method at 312 K. This point is also commented by Referee 1. For the PRV-HS methods, values of  $\delta K_{eq}/K_{eq}$  may have potential systematic bias of ca.  $\pm 4\%$ , which results mostly from the accuracy of temperature of the test solution, as aforementioned (R1. (2)). For the IGS method, values of  $\delta K_{eq}/K_{eq}$  may have potential systematic bias of ca.  $\pm 2\%$ . The IGS method is thus believed to be more accurate. Potential systematic bias in both the PRV-HS method and the IGS method could be a reason why there is the small offset between PRV-HS and IGS method at 312 K.

**R3. Reply to the comment 3 on the fit according to Eq. (13)**

Thank you for the comment.

The fit according to Eq. (13) does not take into account the relative weight of error bars.

**R4. Reply to the comment 4 on the reason for the large variation in the size of error bars in Fig. 5.**

Thank you for the comment.

As Referee 2 comments, there are the large variation in the size of error bars in Fig. 5. Ratio among error bars of the

data at the same temperature is up to the maximum value of 4.5: error bars are 0.084 for 8.921‰ and 0.019 for 51.534‰ at 10.5 °C. Error bars for the data at 8.921‰ tend to be large and error bars for the data at 51.534‰ tend to be small: this reflects static errors of the data at 8.921‰ and 51.534‰.

Errors of the data in Fig. 5 represents statics only (Error\_S). As replied in R1, errors from both statics (Error\_S) and potential systematic bias of  $\pm 2\%$  (Error\_B) will be used as errors (Error\_T) for the data in Fig. 5:  $(\text{Error}_T) = (\text{Error}_S) + (\text{Error}_B)$ . Error bars of the data in Fig. 5m represent Error\_T. As seen in Fig. 5m, the ratios among error bars of the data at the same temperature are smaller than the corresponding ratios in Fig. 5. For example, the ratio of error bars between at 8.921‰ and 51.534‰ at 10.5 °C is 2.7 while it is 4.5 in Fig. 5 as aforementioned.

In the revised manuscript, error bars will be represented by Error\_T in Fig. 5m.

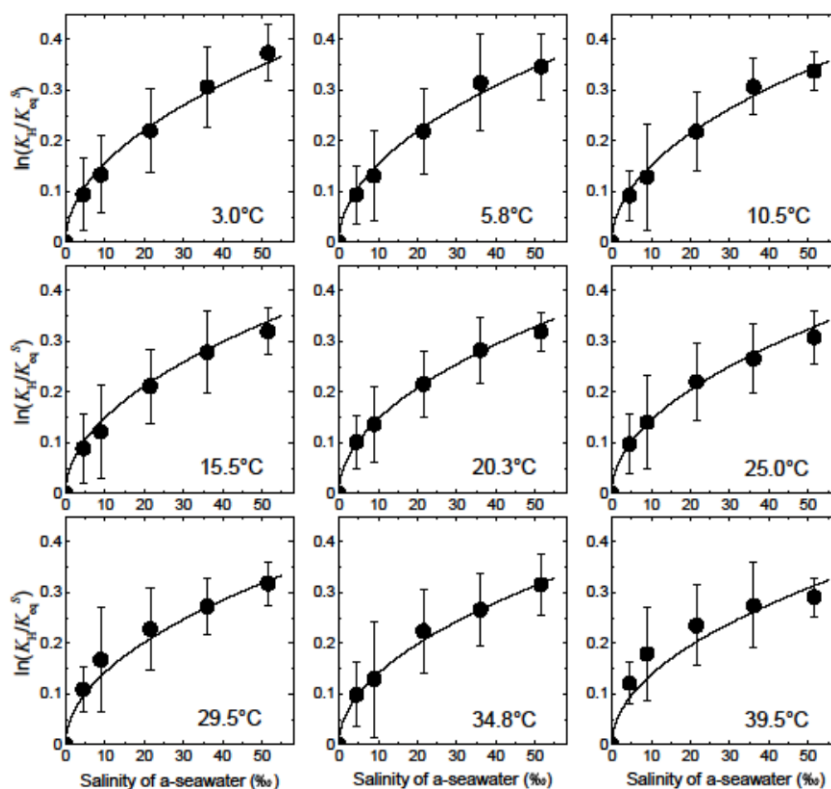

**Figure 5m.** Plots of  $\ln(K_H(T)/K_H^S(T))$  vs. salinity in a-seawater at each temperature. Bold curves represent the fitting obtained by Eq. (22). Error bars represent errors reflecting both  $2\sigma$  for the average and potential systematic bias of  $K_{eq}^S$ .

**R5. Reply to the comment 5 on the discussion on the  $S^{0.5}$  components of the fit (deviation from Setchenow).**

Thank you for the comment.

The reason why  $\ln(K_H/K_{eq}^S)$  is proportional to  $S^{0.5}$  rather than  $S$  is still unclear.

I will describe a potential reason for this proportionality simply in the text, and make discussion in *Supporting Information* as follows.

L20-21, P9:

The reason for this salting-out effect of  $\text{CH}_2\text{F}_2$  solubility in a-seawater is not clear. Specific properties of  $\text{CH}_2\text{F}_2$  –small molecular volume, which results in small work of cavity creation (Graziano, 2004; 2008), and large solute-solvent attractive potential energy in water and a-seawater– may cause deviation from Setchenow relationship (*Supporting Information*).

In *Supporting Information*:

I will calculate Ben-Naim standard Gibbs energy  $\Delta G^\circ$ , enthalpy  $\Delta H^\circ$ , and entropy  $\Delta S^\circ$  changes for dissolution of  $\text{CH}_2\text{F}_2$  in water because these values correspond to the values for the transfer from a fixed position in the gas phase to a fixed position in water. Values of  $\Delta G^\circ$ ,  $\Delta H^\circ$ , and  $\Delta S^\circ$  are calculated on the basis of the Ostwald solubility coefficient,  $L(T)$ , as follows.

$$\ln(L(T)) = \ln\left(RTK_{\text{eq}}^S(T)\right) \quad (\text{B1})$$

$$\Delta G^\circ = R'T\ln(L(T)) \quad (\text{B2})$$

$$\Delta H^\circ = -\frac{\partial}{\partial(1/T)}\left(\frac{\Delta G^\circ}{T}\right) \quad (\text{B3})$$

$$\Delta S^\circ = \frac{\Delta H^\circ - \Delta G^\circ}{T} \quad (\text{B4})$$

where both  $R$  and  $R'$  represent gas constant but their units are different:  $R = 0.0821$  in  $\text{atm dm}^3 \text{K}^{-1} \text{mol}^{-1}$ ;  $R' = 8.314$  in  $\text{J K}^{-1} \text{mol}^{-1}$ .

Combining Eqs. (B1), (B2), (B3), and (B4) with Eqs. (14) and (15),  $\Delta G^\circ$  ( $\text{kJ mol}^{-1}$ ),  $\Delta H^\circ$  ( $\text{kJ mol}^{-1}$ ), and  $\Delta S^\circ$  ( $\text{J mol}^{-1} \text{K}^{-1}$ ) are represented by  $\Delta G_{\text{sol}}$  and  $\Delta H_{\text{sol}}$  as follows:

$$\Delta G^\circ = \Delta G_{\text{sol}} + R'T\ln(RT) \quad (\text{B5})$$

$$\Delta H^\circ = \Delta H_{\text{sol}} + R'T \quad (\text{B6})$$

$$\Delta S^\circ = \frac{\Delta H_{\text{sol}} - \Delta G_{\text{sol}}}{T} + R'T - R'T\ln(RT) \quad (\text{B7})$$

Values of  $\Delta G^\circ$ ,  $\Delta H^\circ$ , and  $\Delta S^\circ$  calculated at 298 K are listed in Table S2. Table S2 also lists values of  $\Delta G^\circ$ ,  $\Delta H^\circ$ , and  $\Delta S^\circ$  reported for  $\text{CH}_3\text{F}$  and  $\text{C}_2\text{H}_6$  (Graziano, 2004) and  $\text{CH}_4$  (Graziano, 2008) at 298 K. The chemicals, which having a methyl group, in Table 2 are classified into two groups ( $\text{CH}_2\text{F}_2$  and  $\text{CH}_3\text{F}$ ;  $\text{CH}_4$  and  $\text{C}_2\text{H}_6$ ) according to  $\Delta G^\circ$ .

**Table S2. Ben-Naim standard hydration Gibbs energy  $\Delta G^\circ$ , enthalpy  $\Delta H^\circ$ , and entropy  $\Delta S^\circ$  changes for dissolution of  $\text{CH}_2\text{F}_2$  at 298 K determined here and the corresponding values reported for  $\text{CH}_3\text{F}$  and  $\text{C}_2\text{H}_6$  (Graziano, 2004) and  $\text{CH}_4$  (Graziano, 2008).**

|                         | $\Delta G^\circ$<br>( $\text{kJ mol}^{-1}$ ) | $\Delta H^\circ$<br>( $\text{kJ mol}^{-1}$ ) | $\Delta S^\circ$<br>( $\text{J K}^{-1} \text{mol}^{-1}$ ) | $\Delta G_c$<br>( $\text{kJ mol}^{-1}$ ) | $E_a$<br>( $\text{kJ mol}^{-1}$ ) | $\Delta H^h$<br>( $\text{kJ mol}^{-1}$ ) |
|-------------------------|----------------------------------------------|----------------------------------------------|-----------------------------------------------------------|------------------------------------------|-----------------------------------|------------------------------------------|
| $\text{CH}_2\text{F}_2$ | -1.1                                         | -14.7                                        | -45.4                                                     |                                          |                                   |                                          |
| $\text{CH}_3\text{F}$   | -0.9                                         | -15.8                                        | -50.0                                                     | 23.3                                     | -24.3                             | 8.5                                      |
| $\text{CH}_4$           | 8.4                                          | -10.9                                        | -64.7                                                     | 22.9                                     | -14.5                             | 3.7                                      |
| $\text{C}_2\text{H}_6$  | 7.7                                          | -17.5                                        | -84.5                                                     | 28.4                                     | -20.7                             | 3.2                                      |

Table 2 lists values of  $\Delta G_c$ ,  $E_a$  and  $\Delta H^h$  deduced using a scaled particle theory (Graziano, 2004; 2008).  $\Delta G_c$  is the work of cavity creation to insert a solute in a solvent.  $E_a$  is a solute-solvent attractive potential energy and accounts for the solute-solvent interactions consisting of dispersion, dipole-induced dipole, and dipole-dipole contributions.  $\Delta H^h$  is enthalpy of solvent molecules reorganization caused by solute insertion. The solvent reorganization mainly involves a rearrangement of H-bonds.

$\Delta G_c$  is entropic in nature in all liquids, being a measure of the excluded volume effect due to a reduction in the spatial configurations accessible to liquid molecules upon cavity creation. Hence,  $\text{C}_2\text{H}_6$  has larger value of  $\Delta G_c$  than  $\text{CH}_3\text{F}$  and  $\text{CH}_4$ .  $\Delta G_c$ ,  $E_a$ , and  $\Delta H^h$  are related to  $\Delta G^\circ$  and  $\Delta H^\circ$  as follows (Graziano, 2008):

$$\Delta G^\circ = \Delta G_c + E_a \quad (\text{B8})$$

$$\Delta H^\circ = E_a + \Delta H^h \quad (\text{B9})$$

Table S10m thus suggests that smaller value of  $\Delta G^\circ$  of  $\text{CH}_3\text{F}$  than  $\text{CH}_4$  is due to large solute-solvent attractive potential energy ( $-E_a$ ) of  $\text{CH}_3\text{F}$ .

Graziano (2008) definitively explained the salting-out of  $\text{CH}_4$  by sodium chloride at molecular level on the basis of a

scaled particle theory. He explained that  $\Delta G^*$  increase was linearly related to the increase in the volume packing density of the solutions ( $\xi_3$ ) with adding NaCl. Such a increase of  $\Delta G^*$  is probably the case for salting-out of  $\text{CH}_2\text{F}_2$  by a-seawater observed in this study. He also explained that  $E_a$  was linearly related to the increase in  $\xi_3$  assuming that a fraction of the dipole-induced dipole attractions could be taken into account by the parameterization of the dispersion contribution.

I think the possibility that  $E_a$  may be nonlinearly related to the increase in  $\xi_3$  because of dipole-dipole interaction between  $\text{CH}_2\text{F}_2$  and solvents. Temperature dependence in Eq. (23) suggests that salting-out effect of  $\text{CH}_2\text{F}_2$  by a-seawater is enthalpic. Eqs. (23) and (B9) thus suggests that the salting-out of  $\text{CH}_2\text{F}_2$  is mostly related to change in  $E_a$ .  $\text{CH}_2\text{F}_2$  has relatively small value of  $\Delta G_c$  because of its small molecular volume compared to other chemicals such as  $\text{C}_2\text{H}_6$ . Accordingly,  $\Delta G^*$ , that is, solubility of  $\text{CH}_2\text{F}_2$  would depend on  $E_a$  rather than  $\Delta G_c$ . Therefore, I think that specific properties of  $\text{CH}_2\text{F}_2$  –small molecular volume, which results in small work of cavity creation (Graziano, 2004; 2008), and large solute-solvent attractive potential energy in water and a-seawater– may cause deviation from Setchenow relationship.

The following two references will be cited both in the manuscript and in *Supporting Information*.

Graziano, G.: Case study of enthalpy–entropy noncompensation. *Journal of Chemical Physics*, 120, 4467-4471, doi: 10.1063/1.1644094, 2004.

Graziano, G.: Salting out of methane by sodium chloride: A scaled particle theory study. *Journal of Chemical Physics*, 129, 084506, doi: 10.1063/1.2972979, 2008.

**R6. Reply to the comments 6: how deep is this mixed ocean layer in the model? Does this mean the model estimates an upper limit?**

Thank you for the comments.

The depth of the ocean mix layer in the model is 10 to 600 m. The depth distribution of  $\text{CH}_2\text{F}_2$  dissolved in the ocean mixed layer in each semi-hemisphere is listed in Tables S3 (30° S–90° S), S4 (30° S–0° S), S5 (0° N–30° S) and S6 (30° N–90° N). As seen in these tables, the  $\text{CH}_2\text{F}_2$  dissolved in the ocean mixed layer resides mostly in less than 300 m depth. For example, for the southern semi-hemisphere (30° S–90° S) (Table S3), in August, when the amount of  $\text{CH}_2\text{F}_2$  dissolved in the ocean mixed layer is maximum, 66% of the  $\text{CH}_2\text{F}_2$  dissolved in the mixed layer would reside between 200 m and 300 m depth, and 91 % of the  $\text{CH}_2\text{F}_2$  dissolved in the ocean mixed layer is expected to reside in less than 300 m depth.

As Referee 2 pointed out, model estimates mean an upper limit of the amount of  $\text{CH}_2\text{F}_2$  dissolved in the ocean mixed layer. This point will be clearly described in the revised manuscript as follows.

P10, L23:

As seen in Figure 6, in the southern semi-hemispheric lower troposphere (30° S–90° S), at least 5 % of the atmospheric burden of  $\text{CH}_2\text{F}_2$  would reside in the ocean mixed layer in the winter, and the annual variance of the  $\text{CH}_2\text{F}_2$  residence ratio would be 4%. These ratios are, in fact, upper limits because  $\text{CH}_2\text{F}_2$  in the ocean mixed layer may be undersaturated. It takes days to a few weeks after a change in temperature or salinity for oceanic surface mixed layers to come to equilibrium with the present atmosphere, and equilibration time increases with depth of the surface mixed layer (Fine, 2011). In the estimation using the gridded data here, >90 % of  $\text{CH}_2\text{F}_2$  in the ocean mixed layer would reside in less than 300 m depth (Tables S3, S4, S5 and S6).

Haine and Richards (1995) demonstrated that seasonal variation in ocean mixed layer depth was the key process which affected undersaturation and supersaturation of chlorofluorocarbon 11 (CFC-11), CFC-12 and CFC-113 by use of a one-dimensional slab mixed model. As described above, >90 % of  $\text{CH}_2\text{F}_2$  in the ocean mixed layer is expected to reside in less than 300 m depth. According to the model calculation results by Haine and Richards (1995), saturation of  $\text{CH}_2\text{F}_2$  would

be >0.9 for the ocean mixed layer with less than 300 m depth. The saturation of CH<sub>2</sub>F<sub>2</sub> in the ocean mixed layer is thus estimated to be at least 0.8. In the southern semi-hemispheric lower troposphere (30° S–90° S), therefore, at least 4 % of the atmospheric burden of CH<sub>2</sub>F<sub>2</sub> would reside in the ocean mixed layer in the winter, and the annual variance of the CH<sub>2</sub>F<sub>2</sub> residence ratio would be 3%.

The following two references will be cited in the manuscript.

Fine, R. A.: Observations of CFCs and SF<sub>6</sub> as ocean tracers. *Annual Review of Marine Science*, 3, 173-195, doi:10.1146/annurev.marine.010908.163933, 2011.

Haine, T. W. N. and Richards, K. J.: The influence of the seasonal mixed layer on oceanic uptake of CFCs. *Journal of Geophysical Research*, 100, 10727-10744, doi:10.1029/95JC00629, 1995.

**Table S3. Monthly amount of CH<sub>2</sub>F<sub>2</sub> dissolved in the ocean mixed layer at solubility equilibrium with the atmospheric CH<sub>2</sub>F<sub>2</sub> (1 patm) and the depth distribution of the CH<sub>2</sub>F<sub>2</sub> dissolved in the southern semi-hemisphere (90°S - 30°S).**

|           | Amount<br>(Gg patm <sup>-1</sup> ) | Depth distribution of CH <sub>2</sub> F <sub>2</sub> dissolved in the ocean mixed layer (%) |             |             |             |             |             |
|-----------|------------------------------------|---------------------------------------------------------------------------------------------|-------------|-------------|-------------|-------------|-------------|
|           |                                    | 10 - 100 m                                                                                  | 100 - 200 m | 200 - 300 m | 300 - 400 m | 400 - 500 m | 500 - 600 m |
| January   | 0.0169                             | 94.9                                                                                        | 2.9         | 1.0         | 0.5         | 0.3         | 0.3         |
| February  | 0.0201                             | 92.1                                                                                        | 3.6         | 2.9         | 1.0         | 0.3         | 0.0         |
| March     | 0.0255                             | 87.8                                                                                        | 9.2         | 1.7         | 0.7         | 0.2         | 0.4         |
| April     | 0.0338                             | 66.5                                                                                        | 31.8        | 1.1         | 0.2         | 0.1         | 0.2         |
| May       | 0.0409                             | 48.5                                                                                        | 48.1        | 2.2         | 0.8         | 0.3         | 0.0         |
| June      | 0.0510                             | 26.8                                                                                        | 62.7        | 8.0         | 1.7         | 0.8         | 0.1         |
| July      | 0.0571                             | 14.1                                                                                        | 69.3        | 12.2        | 3.3         | 0.9         | 0.1         |
| August    | 0.0640                             | 8.5                                                                                         | 65.8        | 17.0        | 6.2         | 2.3         | 0.2         |
| September | 0.0609                             | 13.5                                                                                        | 61.0        | 14.6        | 8.2         | 2.7         | 0.0         |
| October   | 0.0504                             | 24.7                                                                                        | 58.6        | 12.1        | 2.9         | 1.4         | 0.3         |
| November  | 0.0335                             | 60.4                                                                                        | 30.5        | 4.6         | 2.2         | 2.3         | 0.1         |
| December  | 0.0196                             | 95.1                                                                                        | 4.3         | 0.4         | 0.2         | 0.0         | 0.0         |

**Table S4. Monthly amount of CH<sub>2</sub>F<sub>2</sub> dissolved in the ocean mixed layer at solubility equilibrium with the atmospheric CH<sub>2</sub>F<sub>2</sub> (1 patm) and the depth distribution of the CH<sub>2</sub>F<sub>2</sub> dissolved in the southern semi-hemisphere (30°S - 0°S).**

|           | Amount<br>(Gg patm <sup>-1</sup> ) | Depth distribution of CH <sub>2</sub> F <sub>2</sub> dissolved in the ocean mixed layer (%) |             |             |             |             |             |
|-----------|------------------------------------|---------------------------------------------------------------------------------------------|-------------|-------------|-------------|-------------|-------------|
|           |                                    | 10 - 100 m                                                                                  | 100 - 200 m | 200 - 300 m | 300 - 400 m | 400 - 500 m | 500 - 600 m |
| January   | 0.0084                             | 99.6                                                                                        | 0.4         | 0           | 0           | 0           | 0           |
| February  | 0.0084                             | 99.7                                                                                        | 0.3         | 0           | 0           | 0           | 0           |
| March     | 0.0089                             | 100.0                                                                                       | 0           | 0           | 0           | 0           | 0           |
| April     | 0.0106                             | 100.0                                                                                       | 0           | 0           | 0           | 0           | 0           |
| May       | 0.0131                             | 100.0                                                                                       | 0           | 0           | 0           | 0           | 0           |
| June      | 0.0163                             | 97.1                                                                                        | 2.9         | 0           | 0           | 0           | 0           |
| July      | 0.0189                             | 80.1                                                                                        | 19.9        | 0           | 0           | 0           | 0           |
| August    | 0.0193                             | 73.1                                                                                        | 26.9        | 0           | 0           | 0           | 0           |
| September | 0.0165                             | 82.2                                                                                        | 17.8        | 0           | 0           | 0           | 0           |
| October   | 0.0124                             | 94.6                                                                                        | 5.4         | 0           | 0           | 0           | 0           |
| November  | 0.0097                             | 99.9                                                                                        | 0.1         | 0           | 0           | 0           | 0           |
| December  | 0.0087                             | 100.0                                                                                       | 0           | 0           | 0           | 0           | 0           |

**Table S5. Monthly amount of CH<sub>2</sub>F<sub>2</sub> dissolved in the ocean mixed layer at solubility equilibrium with the atmospheric CH<sub>2</sub>F<sub>2</sub> (1 patm) and the depth distribution of the CH<sub>2</sub>F<sub>2</sub> dissolved in the southern semi-hemisphere (0°N - 30°N).**

|           | Amount<br>(Gg patm <sup>-1</sup> ) | Depth distribution of CH <sub>2</sub> F <sub>2</sub> dissolved in the ocean mixed layer (%) |             |             |             |             |             |
|-----------|------------------------------------|---------------------------------------------------------------------------------------------|-------------|-------------|-------------|-------------|-------------|
|           |                                    | 10 - 100 m                                                                                  | 100 - 200 m | 200 - 300 m | 300 - 400 m | 400 - 500 m | 500 - 600 m |
| January   | 0.0132                             | 96.4                                                                                        | 3.6         | 0           | 0           | 0           | 0           |
| February  | 0.0126                             | 95.9                                                                                        | 4.1         | 0           | 0           | 0           | 0           |
| March     | 0.0107                             | 98.7                                                                                        | 1.3         | 0           | 0           | 0           | 0           |
| April     | 0.0087                             | 99.8                                                                                        | 0.2         | 0           | 0           | 0           | 0           |
| May       | 0.0079                             | 100.0                                                                                       | 0           | 0           | 0           | 0           | 0           |
| June      | 0.0080                             | 100.0                                                                                       | 0           | 0           | 0           | 0           | 0           |
| July      | 0.0084                             | 100.0                                                                                       | 0           | 0           | 0           | 0           | 0           |
| August    | 0.0082                             | 100.0                                                                                       | 0           | 0           | 0           | 0           | 0           |
| September | 0.0080                             | 100.0                                                                                       | 0           | 0           | 0           | 0           | 0           |
| October   | 0.0086                             | 100.0                                                                                       | 0           | 0           | 0           | 0           | 0           |
| November  | 0.0100                             | 100.0                                                                                       | 0           | 0           | 0           | 0           | 0           |
| December  | 0.0118                             | 100.0                                                                                       | 0           | 0           | 0           | 0           | 0           |

**Table S6. Monthly amount of CH<sub>2</sub>F<sub>2</sub> dissolved in the ocean mixed layer at solubility equilibrium with the atmospheric CH<sub>2</sub>F<sub>2</sub> (1 patm) and the depth distribution of the CH<sub>2</sub>F<sub>2</sub> dissolved in the southern semi-hemisphere (30°N - 90°N).**

|           | Amount<br>(Gg patm <sup>-1</sup> ) | Depth distribution of CH <sub>2</sub> F <sub>2</sub> dissolved in the ocean mixed layer (%) |             |             |             |             |             |
|-----------|------------------------------------|---------------------------------------------------------------------------------------------|-------------|-------------|-------------|-------------|-------------|
|           |                                    | 10 - 100 m                                                                                  | 100 - 200 m | 200 - 300 m | 300 - 400 m | 400 - 500 m | 500 - 600 m |
| January   | 0.0205                             | 41.3                                                                                        | 50.1        | 7.0         | 1.4         | 0.2         | 0.0         |
| February  | 0.0225                             | 34.5                                                                                        | 55.3        | 7.1         | 2.3         | 0.6         | 0.2         |
| March     | 0.0208                             | 49.7                                                                                        | 42.3        | 4.9         | 1.7         | 0.7         | 0.6         |
| April     | 0.0147                             | 79.7                                                                                        | 17.6        | 1.7         | 0.4         | 0.0         | 0.6         |
| May       | 0.0081                             | 90.1                                                                                        | 9.9         | 0           | 0           | 0           | 0           |
| June      | 0.0055                             | 97.7                                                                                        | 2.3         | 0           | 0           | 0           | 0           |
| July      | 0.0045                             | 96.6                                                                                        | 3.4         | 0           | 0           | 0           | 0           |
| August    | 0.0048                             | 94.4                                                                                        | 5.6         | 0           | 0           | 0           | 0           |
| September | 0.0059                             | 97.7                                                                                        | 2.3         | 0           | 0           | 0           | 0           |
| October   | 0.0084                             | 99.6                                                                                        | 0.4         | 0           | 0           | 0           | 0           |
| November  | 0.0121                             | 89.6                                                                                        | 10.4        | 0.1         | 0           | 0           | 0           |
| December  | 0.0163                             | 71.0                                                                                        | 26.1        | 2.9         | 0           | 0           | 0           |

**R7. Reply to the comment 7 on how much departure from saturation equilibrium the oceanic mixed layer in the model is.**

Thank you for the comment.

As described in R6, it takes days to a few weeks after a change in temperature or salinity for oceanic surface mixed layers to come to equilibrium with the present atmosphere, and equilibration time increases with depth of the surface mixed layer (Fine, 2011).

Haine and Richards (1995) demonstrated that the seasonal variation in ocean mixed layer depth was the key process which affected undersaturation and supersaturation of chlorofluorocarbon 11 (CFC-11), CFC-12 and CFC-113 by use of a one-dimensional slab mixed model. Specifically, the mixed layer deepening in autumn would cause undersaturation in the mixed layer. In the estimation, >90 % of CH<sub>2</sub>F<sub>2</sub> in the ocean mixed layer is expected to reside in less than 300 m depth (Tables S3, S4, S5 and S6). According to the report by Haine and Richards (1995), saturation of CH<sub>2</sub>F<sub>2</sub> would be >0.9 for the ocean mixed layer with less than 300 m depth. The saturation of CH<sub>2</sub>F<sub>2</sub> in the ocean mixed layer is thus estimated to be at least 0.8.

The manuscript will be revised, as described in R6, and Fine (2011) and Haine and Richards (1995) will be cited.



**R8. Replay to the comment 8 on how the dissolution of CH<sub>2</sub>F<sub>2</sub> into the ocean should affect estimation of CH<sub>2</sub>F<sub>2</sub> emissions in the Southern Hemisphere and their seasonal variability.**

Thank you for the comment.

As Referee 2 pointed out, the atmospheric concentrations that reach the Southern Hemisphere are also affected by transport, chemical removal, and related uncertainties; this should be mentioned.

I will first describe how the dissolution of CH<sub>2</sub>F<sub>2</sub> into the ocean may affect estimation of CH<sub>2</sub>F<sub>2</sub> emissions in the Southern Hemisphere and their seasonal variability, and then I will show the revised text.

In 2012, atmospheric concentrations of CH<sub>2</sub>F<sub>2</sub> in the Northern Hemisphere are by >30% higher than in the Southern Hemisphere (O'Doherty et al., 2014); the strong inter-hemisphere gradient indicates that emissions of CH<sub>2</sub>F<sub>2</sub> are predominantly in the Northern Hemisphere. In the AGAGE 12 box model (Rigby et al., 2013), transport of CH<sub>2</sub>F<sub>2</sub> is dominated by eddy diffusion between the boxes in the model. The seasonal eddy diffusion parameters between the Northern Hemisphere and the Southern Hemisphere in the model are 187 to 568 days in lower troposphere, and 81 to 109 days in upper troposphere (Rigby et al., 2013).

The rate of increase in atmospheric concentration of CH<sub>2</sub>F<sub>2</sub> due to the emission of CH<sub>2</sub>F<sub>2</sub> in the Southern Hemisphere, which is denoted as  $RE_{\text{south}}$  hereafter, is thus more sensitive to change in atmospheric concentrations of CH<sub>2</sub>F<sub>2</sub> in the Southern Hemisphere than those in the Northern Hemisphere, partly because CH<sub>2</sub>F<sub>2</sub> is removed through gas phase reactions with OH (partial atmospheric lifetime of 5.5 years). Furthermore,  $RE_{\text{south}}$  would range small values such as a few % y<sup>-1</sup> or less because emissions of CH<sub>2</sub>F<sub>2</sub> are predominantly in the Northern Hemisphere and because, in 2012, the rate of increase in the global mean mole fraction of CH<sub>2</sub>F<sub>2</sub> was 17% y<sup>-1</sup> (O'Doherty et al., 2014). In estimation of  $RE_{\text{south}}$ , small value of  $RE_{\text{south}}$  would be deduced from difference in the rates of increase of atmospheric concentrations of CH<sub>2</sub>F<sub>2</sub> between hemispheres. Dissolution of CH<sub>2</sub>F<sub>2</sub> in the ocean in the Southern Hemisphere may thus affect estimation of  $RE_{\text{south}}$  and then affect estimation of CH<sub>2</sub>F<sub>2</sub> emissions in the Southern Hemisphere and their seasonal variability.

I will revise the text as follows.

L26-29, P10:

Hence, dissolution of CH<sub>2</sub>F<sub>2</sub> in the ocean, even if dissolution is reversible, may influence estimates of CH<sub>2</sub>F<sub>2</sub> emissions derived from long-term observational data on atmospheric concentrations of CH<sub>2</sub>F<sub>2</sub>; in particular, consideration of dissolution of CH<sub>2</sub>F<sub>2</sub> in the ocean may affect estimates of CH<sub>2</sub>F<sub>2</sub> emissions in the Southern Hemisphere and their seasonal variability [because of slow rates of inter-hemispheric transport and small portion of the CH<sub>2</sub>F<sub>2</sub> emissions in the Southern Hemisphere to the total emissions.](#)

**Specific comments:**

**P2, L28: 'first' is written twice.**

Thank you for the comment.

The text is revised as follows.

[First, the values of  \$K\_H\$  for CH<sub>2</sub>F<sub>2</sub> were determined over the temperature range from 276 to 313 K by means of an inert-gas stripping \(IGS\) method.](#)

**P5, L8: add errors for numbers. Add typical values, their units, and uncertainties of variables for the key equations throughout the manuscript.**

Thank you for the comment.

If redistribution of  $\text{CH}_2\text{F}_2$  in the headspace to the test solution had occurred, the  $K_{\text{H}}$  values determined in this study would be overestimated. Errors due to this redistribution are always negative values. The ratio of the errors to the  $K_{\text{eq}}$  values (%) is  $100 \times \frac{\left(\frac{V_{\text{head}}}{RTV}\right)}{\left(\frac{1}{k_1 RTV}\right)}$ , that is,  $\frac{100k_1 V_{\text{head}}}{F}$ . Under the experimental conditions here, this ratio is calculated to be  $-2.0$  to  $-2.3$  % at  $3.0$  °C and  $-4.6$  to  $-5.1$  % at  $39.5$  °C. Values of this ratio increase as values of  $K_{\text{eq}}$  decrease. This ratio is maximum ( $-6.5$  %) for a-seawater at  $51.534\text{‰}$  and  $39.5$  °C.

Typical values, their units, and uncertainties of variables for the key equations are added as follows.

L6-8, P4:

The solution was magnetically stirred, and its temperature was kept constant within  $\pm 0.2$  K by means of a constant-temperature bath that had both heating and cooling capabilities (NCB-2500, EYELA, Tokyo, Japan) and was connected to the water jacket of the column.

L14-16, P4:

The volumetric flow rate of the gas ( $F_{\text{meas}}$ ) was calibrated with a soap-bubble meter for each experimental run. The soap-bubble meter had been calibrated by means of a high-precision film flow meter SF-1U with VP-2U (Horiba, Kyoto, Japan). Errors of  $F_{\text{meas}}$  are within  $\pm 1\%$ .

L18-19, P4:

All volumetric gas flows were corrected to prevailing temperature and pressure by Eq. (3) (Krummen et al., 2000). Errors due to this correction are within  $\pm 1\%$ . Errors of  $F$  are thus within  $\pm 1.4\%$ .

L13, P5:

Hence Eq. (6) was used to deduce  $K_{\text{eq}}(T)$  from  $k_1$ . If redistribution of  $\text{CH}_2\text{F}_2$  in the headspace to the test solution had occurred, the values determined using Eq. (6) would be overestimated. Errors due to this redistribution are always negative values. Ratio of the errors to the  $K_{\text{eq}}$  values (%) is  $\frac{100k_1 V_{\text{head}}}{F}$ . Values of this ratio increase as values of  $K_{\text{eq}}$  decrease. Under the experimental conditions here, this ratio is calculated to be from  $-2.0$  % for water at  $3.0$  °C to  $-6.5$  % for a-seawater at  $51.534\text{‰}$  and  $39.5$  °C.

L27, P7, Eq. (13):

$$\ln(K_{\text{H}}(T)) = -49.71 + 77.70 \times \left(\frac{100}{T}\right) + 19.14 \times \ln\left(\frac{T}{100}\right) \quad (13)$$

The square-root-of-variance, that is, standard deviation for each fitting coefficient in Eq. (12) is as follows:

$$\delta a_1 = 5.5; \delta a_2 = 8.3; \delta a_3 = 2.8.$$

L10-L26, P9:

This result suggests that  $\ln(K_{\text{H}}(T)/K_{\text{eq}}^S(T))$  varied according to Eq. (18):

$$\ln(K_{\text{H}}(T)/K_{\text{eq}}^S(T)) = k_{s1} S^{0.5} \quad (18)$$

Values of  $k_{s1}$  may be represented by the following function of  $T$ :

$$k_{s1} = b_1 + b_2 \times (100/T) \quad (19)$$

Parameterizations of  $b_1$  and  $b_2$  obtained by fitting all the  $\ln(K_{\text{H}}(T)/K_{\text{eq}}^S(T))$  and  $S$  data at each temperature simultaneously by

means of the nonlinear least-squares method gives Eq. (20).

$$\ln(K_H(T)/K_{eq}^S(T)) = (0.0127 + 0.0099 \times (100/T)) \times S^{0.5} \quad (20)$$

The standard deviation for each fitting coefficient in Eq. (19) is as follows:

$$\delta b_1 = 0.0106; \delta b_2 = 0.0031.$$

Since  $2 \times \delta b_1 > b_1$ , the parameterization by Eq. (19) may be overworked. Accordingly, all the  $\ln(K_H(T)/K_{eq}^S(T))$  and  $S$  data at each temperature are fitted simultaneously using Eq. (21) instead of Eq. (19). The nonlinear least-squares method gives Eq. (22).

$$k_{s1} = b_2 \times (100/T) \quad (21)$$

$$\ln(K_H(T)/K_{eq}^S(T)) = 0.1343 \times (100/T) \times S^{0.5} \quad (22)$$

The standard deviation for the fitting coefficient in Eq. (21) is as follows:  $\delta b_2 = 0.0013$ . As seen in Fig. 5, Eqs. (21) and (22) reproduced the data well.

$\ln(K_H(T)/K_{eq}^S(T))$  depends on  $S^{0.5}$  and follows Eq. (22) rather than the Setchenow dependence (Eq. (17)). Table S7 compares values of  $K_{eq}^S$  calculated by Eq. (22) with those by Eq. (17). The difference between these values of  $K_{eq}^S$  at 35‰ of salinity was within 3% of the  $K_{eq}^S$  value. Decreases in values of  $K_{eq}^S$  are calculated to be 7–8% and 4%, respectively, by Eqs. (17) and (23) as salinity of a-seawater increases from 30‰ to 40‰ at each temperature.

The reason for this salting-out effect of  $\text{CH}_2\text{F}_2$  solubility in a-seawater is not clear. Specific properties of  $\text{CH}_2\text{F}_2$  –small molecular volume, which results in small work of cavity creation (Graziano, 2004; 2008), and large solute-solvent attractive potential energy in water and a-seawater– may cause deviation from Setchenow relationship (*Supporting Information*).

In Eq. (22),  $K_H(T)$  is represented by Eq. (13), as described in Sect. 3.1. Therefore  $K_{eq}^S(T)$  is represented by Eq. (23):

$$\ln(K_{eq}^S(T)) = -49.71 + (77.70 - 0.1343 \times S^{0.5}) \times (100/T) + 19.14 \times \ln(T/100) \quad (23)$$

The values calculated with Eq. (23) are indicated by the bold curves in Fig. 4 and are listed in Table 3. Equation (23) reproduced the experimentally determined values of  $K_H(T)$  and  $K_{eq}^S(T)$  within the uncertainty of these experimental runs.

**P7, L6: What statistical test for outliers was applied? How many points were removed at each temperature.**

Thank you for the comment.

Statistical test for outliers is as follows.

The data with errors being >10% of the data was first excluded. Next, some data were excluded for calculation of the average so that the remaining data were inside the  $2\sigma$  range. This procedure was iterated until all the data were inside the  $2\sigma$  range.

The data points thus excluded was only for  $V$  values of  $0.350 \text{ dm}^3$ . The number of them were eight or fewer at each temperature. The maximum number of the data excluded was corrected to be eight although it was described to be six in the original manuscript. Number of the data thus excluded were indicated in Tables 1m (shown in R1) and 3m.

**Table 3m.** The average of values of  $F/(k_1RTV)$  obtained for  $V$  value of  $0.350 \text{ dm}^3$  and the  $K_{\text{eq}}^S(T)$  value derived from Eq. (23) at each salinity and temperature.  $N$  represents number of experimental runs for the average.

| $T$ (K) | $K_{\text{eq}}^S$ (M atm <sup>-1</sup> ) |        |          |                         |        |          |
|---------|------------------------------------------|--------|----------|-------------------------|--------|----------|
|         | salinity, 4.452 ‰                        |        |          | salinity, 8.921 ‰       |        |          |
|         | average <sup>a, b</sup>                  | $N^c$  | Eq. (23) | average <sup>a, b</sup> | $N^c$  | Eq. (23) |
| 276.15  | 0.108 ± 0.006 (0.008)                    | 8 (0)  | 0.108    | 0.103 ± 0.006 (0.008)   | 21 (0) | 0.104    |
| 278.35  | 0.099 ± 0.004 (0.006)                    | 12 (0) | 0.099    | 0.095 ± 0.006 (0.008)   | 26 (1) | 0.095    |
| 283.65  | 0.086 ± 0.003 (0.005)                    | 9 (0)  | 0.085    | 0.083 ± 0.007 (0.009)   | 24 (0) | 0.082    |
| 288.65  | 0.075 ± 0.004 (0.006)                    | 12 (0) | 0.074    | 0.072 ± 0.005 (0.006)   | 33 (0) | 0.071    |
| 293.45  | 0.065 ± 0.002 (0.003)                    | 10 (0) | 0.065    | 0.063 ± 0.003 (0.004)   | 27 (5) | 0.062    |
| 298.15  | 0.058 ± 0.002 (0.003)                    | 13 (0) | 0.058    | 0.056 ± 0.004 (0.005)   | 26 (2) | 0.056    |
| 303.05  | 0.052 ± 0.001 (0.002)                    | 8 (0)  | 0.052    | 0.049 ± 0.004 (0.005)   | 14 (6) | 0.050    |
| 307.95  | 0.047 ± 0.002 (0.003)                    | 13 (1) | 0.047    | 0.046 ± 0.004 (0.005)   | 23 (1) | 0.045    |
| 312.65  | 0.042 ± 0.001 (0.002)                    | 7 (0)  | 0.042    | 0.040 ± 0.003 (0.004)   | 12 (8) | 0.041    |

| $T$ (K) | $K_{\text{eq}}^S$ (M atm <sup>-1</sup> ) |        |          |                         |        |          |
|---------|------------------------------------------|--------|----------|-------------------------|--------|----------|
|         | salinity, 21.520 ‰                       |        |          | salinity, 36.074 ‰      |        |          |
|         | average <sup>a, b</sup>                  | $N^c$  | Eq. (23) | average <sup>a, b</sup> | $N^c$  | Eq. (23) |
| 276.15  | 0.095 ± 0.006 (0.008)                    | 20 (0) | 0.095    | 0.088 ± 0.005 (0.007)   | 21 (0) | 0.088    |
| 278.35  | 0.087 ± 0.005 (0.007)                    | 22 (0) | 0.087    | 0.079 ± 0.006 (0.008)   | 20 (3) | 0.081    |
| 283.65  | 0.075 ± 0.004 (0.006)                    | 15 (1) | 0.076    | 0.069 ± 0.002 (0.003)   | 18 (2) | 0.071    |
| 288.65  | 0.066 ± 0.004 (0.005)                    | 20 (0) | 0.066    | 0.062 ± 0.004 (0.005)   | 19 (4) | 0.062    |
| 293.45  | 0.058 ± 0.003 (0.004)                    | 14 (0) | 0.058    | 0.054 ± 0.002 (0.003)   | 19 (4) | 0.055    |
| 298.15  | 0.052 ± 0.003 (0.004)                    | 20 (0) | 0.052    | 0.049 ± 0.002 (0.003)   | 24 (4) | 0.049    |
| 303.05  | 0.046 ± 0.003 (0.004)                    | 16 (0) | 0.046    | 0.044 ± 0.002 (0.003)   | 16 (0) | 0.044    |
| 307.95  | 0.042 ± 0.003 (0.004)                    | 16 (0) | 0.042    | 0.040 ± 0.002 (0.003)   | 15 (2) | 0.040    |
| 312.65  | 0.038 ± 0.002 (0.003)                    | 16 (0) | 0.038    | 0.036 ± 0.002 (0.003)   | 16 (0) | 0.037    |

| $T$ (K) | $K_{\text{eq}}^S$ (M atm <sup>-1</sup> ) |        |          |
|---------|------------------------------------------|--------|----------|
|         | salinity, 51.534 ‰                       |        |          |
|         | average <sup>a, b</sup>                  | $N^c$  | Eq. (23) |
| 276.15  | 0.081 ± 0.003 (0.005)                    | 10 (0) | 0.082    |
| 278.35  | 0.077 ± 0.003 (0.005)                    | 15 (0) | 0.076    |
| 283.65  | 0.067 ± 0.001 (0.003)                    | 9 (1)  | 0.066    |
| 288.65  | 0.059 ± 0.002 (0.003)                    | 14 (1) | 0.058    |
| 293.45  | 0.052 ± 0.001 (0.002)                    | 7 (3)  | 0.052    |
| 298.15  | 0.047 ± 0.002 (0.003)                    | 15 (0) | 0.047    |
| 303.05  | 0.042 ± 0.001 (0.002)                    | 8 (0)  | 0.042    |
| 307.95  | 0.038 ± 0.002 (0.003)                    | 12 (0) | 0.039    |
| 312.65  | 0.036 ± 0.001 (0.002)                    | 7 (1)  | 0.036    |

a. Errors are  $2\sigma$  for the average only.; b. Number in parenthesis represents an error reflecting both  $2\sigma$  for the average and potential systematic bias.; c. Number in parenthesis represents number of experimental runs excluded for the average.

**Eq (17). For sake of discussion, can a  $k_s$  value be given here? And what is the effect of including  $k_s$  vs  $k_{s1}$ ,  $k_{s2}$  in the model - does it make a difference?**

Thank you for the comment.

In Table S7, values of  $k_s$  were given, and the  $K_{\text{eq}}$  values calculated by Eq. (17) were compared to those by Eq. (22) at salinity of 30, 35 and 40 ‰ and each temperature. The text on lines 6-8 and lines 20-21 in page 9 will be revised as follows.

**L6-8, P9:**

Figure 5 plots  $\ln(K_H(T)/K_{eq}^S(T))$  against  $S$  at each temperature. Table S7 lists values of  $k_s$  determined by fitting the data at each temperature by use of Eq. (17). If the  $K_{eq}^S(T)$  values obeyed Eq. (17), the data at each temperature in Fig. 5 would fall on a straight line passing through the origin, but they did not. Figure 5 reveals that the salinity dependence of  $CH_2F_2$  solubility in a-seawater cannot be represented by Eq. (17).

**L20-21, P9:**

$\ln(K_H(T)/K_{eq}^S(T))$  depends on  $S^{0.5}$  and follows Eq. (22) rather than the Setchenow equation (Eq. (17)). Table S14m lists ratios of  $K_{eq}^S$  calculated by Eq. (17) to those by Eq. (22). Difference between values of  $K_{eq}^S$  calculated by Eqs. (17) and (22) at 35‰ of salinity was within 3% of the  $K_{eq}^S$  value. Decreases in values of  $K_{eq}^S$  are calculated to be 7–8% and 4%, respectively, by Eqs. (17) and (23) as salinity of a-seawater increases from 30‰ to 40‰ at each temperature.

The reason for this salting-out effect of  $CH_2F_2$  solubility in a-seawater is not clear.

**Table S7. Values of  $k_s$  (Eq. (17)) and comparison of values of  $K_{eq}^S$  calculated at each temperature by Eq. (17) with those by Eq. (22).**

| Temperature<br>(°C) | $k_s$<br>(‰ <sup>-1</sup> ) | [ $K_{eq}^S$ from Eq. (17)] / [ $K_{eq}^S$ from Eq. (22)] |        |        | [ $K_{eq}^S$ at 30‰] / [ $K_{eq}^S$ at 40‰] |          |
|---------------------|-----------------------------|-----------------------------------------------------------|--------|--------|---------------------------------------------|----------|
|                     |                             | at 30‰                                                    | at 35‰ | at 40‰ | Eq. (17)                                    | Eq. (23) |
| 3.0                 | 0.00811                     | 1.027                                                     | 1.008  | 0.988  | 1.084                                       | 1.043    |
| 5.8                 | 0.00785                     | 1.033                                                     | 1.014  | 0.995  | 1.082                                       | 1.042    |
| 10.5                | 0.00768                     | 1.033                                                     | 1.016  | 0.997  | 1.080                                       | 1.042    |
| 15.5                | 0.00718                     | 1.044                                                     | 1.028  | 1.012  | 1.074                                       | 1.041    |
| 20.3                | 0.00728                     | 1.037                                                     | 1.020  | 1.003  | 1.076                                       | 1.040    |
| 25.0                | 0.00704                     | 1.040                                                     | 1.024  | 1.008  | 1.073                                       | 1.039    |
| 29.9                | 0.00731                     | 1.027                                                     | 1.010  | 0.992  | 1.076                                       | 1.039    |
| 34.8                | 0.00713                     | 1.029                                                     | 1.012  | 0.995  | 1.074                                       | 1.038    |
| 39.5                | 0.00709                     | 1.026                                                     | 1.010  | 0.992  | 1.073                                       | 1.038    |
